# Supplementary material for: A theoretical study on a series of polycyclic conjugated hydrocarbons—dinaphthobenzo[1,2:4,5]dicyclobutadienes with tunable charge transport properties by controlling [N]phenylenes and (anti)aromaticity
Source: Royal Society of Chemistry journal article supplement (doi:10.1039/c9tc01660k), 2019-01-01
Supplement: c9tc01660k1.pdf [file c9tc01660k1.pdf]

## Supporting information for

A theoretical study on a series of polycyclic conjugated hydrocarbons —  
dinaphthobenzo[1,2:4,5]dicyclobutadienes with the tunable charge  
transport property by controlling [N]phenylenes and (anti)aromaticity

Hang Yin,<sup>a,b</sup> Daoyuan Zheng,<sup>a,b</sup> Yan Qiao<sup>c</sup> and Xiaofang Chen<sup>a,\*</sup>

---

<sup>a</sup> Institute of Molecular Sciences and Engineering, Shandong University, Qingdao, 266237, P. R. China.  
E-mail: xf.chen@sdu.edu.cn

<sup>b</sup> State Key Laboratory of Molecular Reaction Dynamics, Dalian Institute of Chemical Physics, Chinese Academy of Science, Dalian 116023, P. R. China.

<sup>c</sup> Department of Pathophysiology, School of Basic Medical Sciences, Zhengzhou University, Zhengzhou, 450001, P. R. China.

## Index

|                                                                                                                                                                                                                                                                                                                                                                                     |         |
|-------------------------------------------------------------------------------------------------------------------------------------------------------------------------------------------------------------------------------------------------------------------------------------------------------------------------------------------------------------------------------------|---------|
| <b>Section S.1.</b> Computational Details of Marcus Rate Parameters                                                                                                                                                                                                                                                                                                                 | S3      |
| <b>Figure S1.</b> The LUMO+1 diagram for <b>DNBDC1~DNBDC5</b> at the MN15/6-31G* level                                                                                                                                                                                                                                                                                              | S4      |
| <b>Figure S2.</b> The schematic molecular packing model for DNBDCs                                                                                                                                                                                                                                                                                                                  | S5      |
| <b>Figure S3.</b> The FMO diagram for <b>DNBDC1~DNBDC5-dimer</b> at the $wB97XD/6-31G^*$ level.                                                                                                                                                                                                                                                                                     | S6      |
| <b>Table S1.</b> The experimental value and calculated frontier molecular orbitals (FMOs) for <b>DNBDC1</b> screened by different functionals (According to Incremental HF Exchange Component (HF%)) with the 6-31G* basis set                                                                                                                                                      | S7      |
| <b>Table S2.</b> The calculated electron density (ED), Shannon entropy (SE) and shannon aromaticity (SA) values towards CBD1, CBD2 and core of <b>DNBDC1~DNBDC5</b>                                                                                                                                                                                                                 | S8      |
| <b>Table S3.</b> The optimized every step of the geometrical configuration for <b>DNBDC1-dimer</b> at CAM-B3LYP/6-31G* level                                                                                                                                                                                                                                                        | S9      |
| <b>Table S4.</b> The optimized every step of the geometrical configuration for <b>DNBDC1-dimer</b> at $wB97XD/6-31G^*$ level.                                                                                                                                                                                                                                                       | S10     |
| <b>Table S5.</b> The transition dipole moment of $x$ ( $\mu_x$ ), $y$ ( $\mu_y$ ) and $z$ orientations ( $\mu_z$ ) (a.u.), the resultant transition dipole moment $\mu_{tr}$ (a.u.) and orbital energy difference $\Delta E$ (eV), and the electronic coupling values of each states $V$ (eV), afterwards calculated the total electronic coupling values $V_{total}$ (eV)          | S11-S13 |
| <b>Table S6.</b> The calculated reorganization energy $\lambda$ (eV) for <b>DNBDC1~DNBDC5</b>                                                                                                                                                                                                                                                                                       | S14     |
| <b>Table S7.</b> The calculated charge hopping rates for <b>DNBDC1~DNBDC5</b> at 6.5 Å, 8.5 Å and 14.9 Å by Marcus semi-classical equation                                                                                                                                                                                                                                          | S15     |
| <b>Table S8.</b> The transition dipole moment of $x$ ( $\mu_x$ ), $y$ ( $\mu_y$ ) and $z$ orientations ( $\mu_z$ ) (a.u.), the resultant transition dipole moment $\mu_{tr}$ (a.u.) and orbital energy difference $\Delta E$ (eV), and the electronic coupling values of each states $V$ (eV), afterwards calculated the total electronic coupling values $V_{total}$ (eV) at 8.5 Å | S16-S18 |
| <b>Table S9</b> The transition dipole moment of $x$ ( $\mu_x$ ), $y$ ( $\mu_y$ ) and $z$ orientations ( $\mu_z$ ) (a.u.), the resultant transition dipole moment $\mu_{tr}$ (a.u.) and orbital energy difference $\Delta E$ (eV), and the electronic coupling values of each states $V$ (eV), afterwards calculated the total electronic coupling values $V_{total}$ (eV) at 14.9 Å | S19-S21 |

## Section S.1. Computational Details of Marcus Rate Parameters.

Our simulation model is based on a combination of first-principles quantum mechanics calculations and Marcus semi-classical equation. By using the hopping mechanism to describe the charge transfer, the transfer rate ( $k$ ) is described by the Marcus semi-classical equation:

$$k = \frac{V^2}{\hbar} \left( \frac{\pi}{\lambda k_B T} \right)^{1/2} \exp \left( -\frac{\lambda^2}{4k_B T} \right) \quad (1)$$

Where  $V$  is the electronic coupling between adjacent molecules in the crystal structure,  $\lambda$  is the reorganization energy,  $T$  is the temperature and  $k_B$  is the Boltzmann constant.

The electronic coupling  $V$  of the two states ( $S_0$  and  $S_n$  states) from the generalized Mulliken–Hush (GMH) formalism can be expressed as:

$$V = \frac{\mu_{tr} \Delta E}{\sqrt{(\Delta\mu)^2 + 4(\mu_{tr})^2}} \quad (2)$$

Where  $\mu_{tr}$  is the calculated transition dipole moment,  $\Delta\mu$  is the dipole moment difference between  $S_0$  and  $S_n$  states, which is negligible between two same molecules, and  $\Delta E$  is the vertical excitation energy. The calculated values of  $V$  were summarized in Table S5, S8 and S9.

The  $\lambda$  of charge hopping depends on the rearrangement of the nuclear positions of molecules, we calculated  $\lambda$  as:

$$\lambda = [E^+(M) - E^+(M^+)] + [E(M^+) - E(M)] \quad (3)$$

Here,  $E(M)$  and  $E(M^+)$  are the neutral state energies at the optimal ground geometries and cation geometries, respectively.  $E^+(M^+)$  and  $E^+(M)$  refer to the energies of the cation state at the optimal cation and neutral geometries, respectively. The calculated values of  $\lambda$  were summarized in Table S6.

Based on these parameters, the charge hopping rate  $k$  can be obtained by Marcus semi-classical model. All the above mentioned calculations about Marcus rate expression were also performed in the Gaussian 16 A.03 software package.

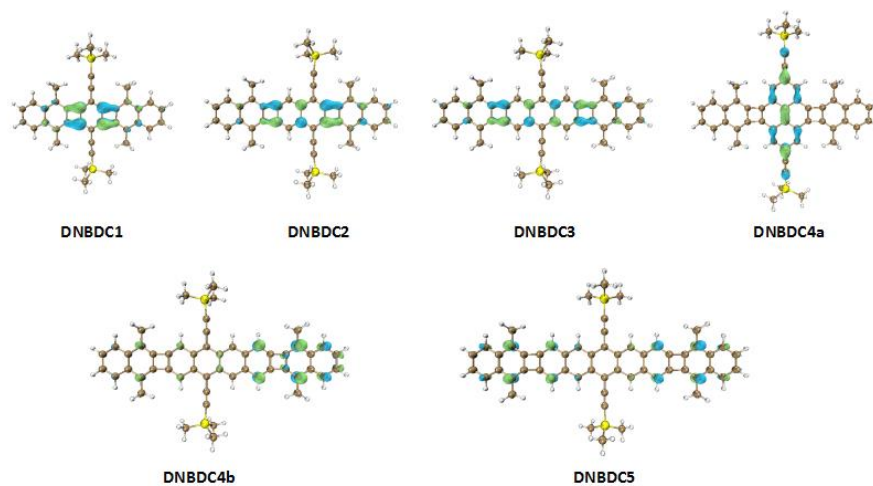

**Figure S1.** The LUMO+1 diagram for **DNBDC1~DNBDC5** at the MN15/6-31G\* level.

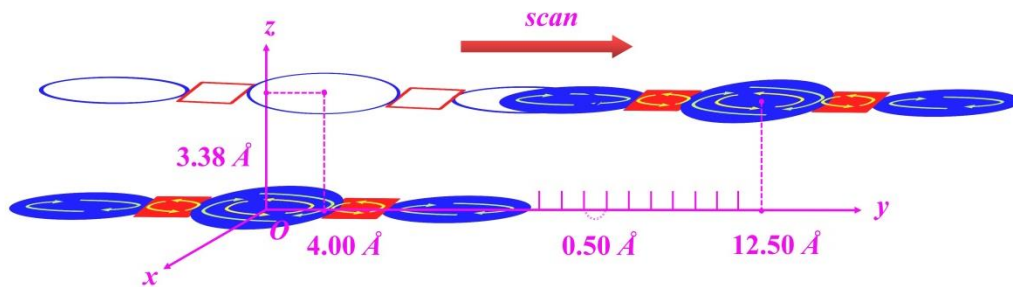

**Figure S2.** The schematic molecular packing model for DNBDCs (Herein, the centres of bottom DNBDC sets as the origin of coordinate, the direction of chain length sets as x-axis, the optimized step length of x-axis sets as  $0.50 \text{ \AA}$ , the direction of chain wide sets as y-axis, and the direction of vertical interface packing sets as z-axis).

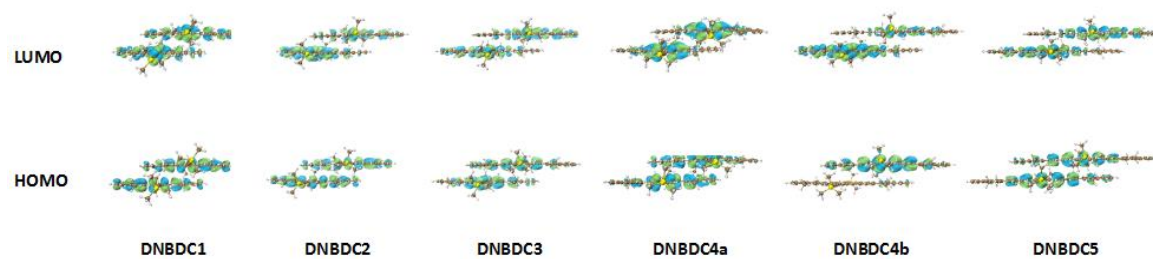

**Figure S3.** The FMO diagram for **DNBD1~DNBD5**-dimer at the *w*B97XD/6-31G\* level.

**Table S1.** The experimental value and calculated frontier molecular orbitals (FMOs) for **DNBDC1** screened by different functionals (According to incremental HF exchange component (HF%)) at the 6-31G\* basis set.

|          | HF%  | HOMO  | LUMO  | $E_g$ |
|----------|------|-------|-------|-------|
| exp.     | --   | -5.66 | -2.96 | 2.70  |
| B3LYP    | 0.20 | -4.96 | -1.98 | 2.97  |
| B3PW91   | 0.20 | -5.07 | -2.10 | 2.97  |
| PBE0     | 0.25 | -4.41 | -2.47 | 1.94  |
| M06      | 0.27 | -5.21 | -1.89 | 3.32  |
| PBE0-1/3 | 0.33 | -4.41 | -2.45 | 1.96  |
| PBE38    | 0.38 | -4.41 | -2.44 | 1.97  |
| MN15     | 0.44 | -5.67 | -1.46 | 4.20  |
| M062X    | 0.54 | -6.15 | -1.33 | 4.83  |

**Table S2.** The calculated electron density (ED), Shannon entropy (SE) and shannon aromaticity (SA) values towards CBD1, CBD2 and core of **DNBDC1~ DNBDC5**.

|                | CBD1 |      |                       | CBD2 |      |                       | CORE |      |                       |
|----------------|------|------|-----------------------|------|------|-----------------------|------|------|-----------------------|
|                | ED   | SE   | SA                    | ED   | SE   | SA                    | ED   | SE   | SA                    |
| <b>DNBDC1</b>  | 1.11 | 1.38 | $3.32 \times 10^{-3}$ | 1.11 | 1.38 | $3.33 \times 10^{-3}$ | 1.82 | 1.79 | $3.25 \times 10^{-5}$ |
| <b>DNBDC2</b>  | 1.11 | 1.38 | $2.81 \times 10^{-3}$ | 1.11 | 1.38 | $3.03 \times 10^{-3}$ | 3.33 | 2.40 | $1.69 \times 10^{-3}$ |
| <b>DNBDC3</b>  | 1.11 | 1.38 | $2.77 \times 10^{-3}$ | 1.11 | 1.38 | $2.33 \times 10^{-3}$ | 4.83 | 2.77 | $1.70 \times 10^{-3}$ |
| <b>DNBDC4a</b> | 1.12 | 1.38 | $6.92 \times 10^{-3}$ | 1.12 | 1.38 | $6.92 \times 10^{-3}$ | 5.75 | 2.94 | $8.88 \times 10^{-4}$ |
| <b>DNBDC4b</b> | 1.11 | 1.38 | $2.06 \times 10^{-3}$ | 1.10 | 1.38 | $1.88 \times 10^{-3}$ | 6.33 | 3.04 | $1.80 \times 10^{-4}$ |
| <b>DNBDC5</b>  | 1.10 | 1.38 | $1.76 \times 10^{-3}$ | 1.10 | 1.38 | $1.76 \times 10^{-3}$ | 7.84 | 3.26 | $1.78 \times 10^{-3}$ |



**Table S3.** The optimized every step of the geometrical configuration for **DNBDC1**-dimer at CAM-B3LYP/6-31G\* level.

| $x$  | HF(a.u.)     | HF(eV)           | Dipole (a.u.) |            |            |
|------|--------------|------------------|---------------|------------|------------|
|      |              |                  | x             | y          | z          |
| 4.0  | -4250.245635 | -115653.43397399 | -0.1064523    | 0.04449    | 0.1611256  |
| 4.5  | -4250.249128 | -115653.52902201 | -0.0209489    | 0.0123234  | -0.0004531 |
| 5.0  | -4250.249167 | -115653.53006963 | 0.0186209     | -0.0083952 | 0.0044031  |
| 5.5  | -4250.248963 | -115653.52453764 | -0.0281626    | 0.0019801  | 0.0240172  |
| 6.0  | -4250.249122 | -115653.52885330 | -0.0163870    | 0.0084066  | 0.0066423  |
| 6.5  | -4250.249085 | -115653.52785466 | -0.0370038    | -0.002729  | 0.0191409  |
| 7.0  | -4250.249108 | -115653.52848867 | 0.0007372     | -0.0004891 | -0.0040644 |
| 7.5  | -4250.249096 | -115653.52814581 | 0.0003521     | 0.0081929  | 0.0084048  |
| 8.0  | -4250.249107 | -115653.52846146 | 0.0000979     | -0.0000233 | -0.0002703 |
| 8.5  | -4250.246973 | -115653.47038775 | -0.0001228    | 0.0000164  | 0.0001402  |
| 9.0  | -4250.246973 | -115653.47038775 | 0.0000611     | 0.0000906  | 0.0002063  |
| 9.5  | -4250.246981 | -115653.47058639 | -0.0030118    | 0.0009175  | 0.0008482  |
| 10.0 | -4250.246213 | -115653.44971283 | 0.0890626     | -0.0368959 | -0.0611204 |
| 10.5 | -4250.246981 | -115653.47058911 | -0.0032691    | 0.0008801  | 0.0008255  |
| 11.0 | -4250.244138 | -115653.39325000 | 0.0133308     | -0.0018121 | -0.0109681 |
| 11.5 | -4250.246725 | -115653.46364214 | 0.2533142     | 0.0800023  | -0.1160602 |
| 12.0 | -4250.246866 | -115653.46747073 | -0.1891212    | -0.0875232 | 0.0626859  |
| 12.5 | -4250.247246 | -115653.47781907 | -0.4492933    | -0.0431894 | 0.1640091  |

**Table S4.** The optimized every step of the geometrical configuration for **DNBDC1**-dimer at  $wB97XD/6-31G^*$  level.

| $x$ | HF(a.u.)       | HF(eV)           | Dipole (a.u.) |            |            |
|-----|----------------|------------------|---------------|------------|------------|
| 40  | -4251.71706250 | -115693.47298769 | 0.0031719     | -0.0026329 | -0.004768  |
| 45  | -4251.71757180 | -115693.48684625 | 0.0001558     | -0.0000707 | -0.0000724 |
| 50  | -4251.71761670 | -115693.48806802 | -0.0003436    | 0.0001586  | 0.0007543  |
| 55  | -4251.71761650 | -115693.48806258 | 0.0001511     | -0.0001881 | -0.0005844 |
| 60  | -4251.71761860 | -115693.48811973 | 0.0000469     | -0.0000021 | -0.000087  |
| 65  | -4251.71761840 | -115693.48811428 | 0.0000470     | 0.0000342  | 0.0000628  |
| 70  | -4251.71761800 | -115693.48810340 | -0.0000834    | -0.00005   | -0.000302  |
| 75  | -4251.71761860 | -115693.48811973 | 0.0000000     | -0.0000946 | -0.000151  |
| 80  | -4251.71761860 | -115693.48811973 | 0.0001811     | -0.0000176 | -0.0003315 |
| 85  | -4251.71710840 | -115693.47423667 | 0.0014098     | -0.0016781 | -0.0037522 |
| 90  | -4251.71710860 | -115693.47424212 | -0.0014504    | 0.0017691  | 0.0037848  |
| 95  | -4251.71710890 | -115693.47425028 | 0.0018237     | -0.0017798 | -0.004057  |
| 100 | -4251.71761840 | -115693.48811428 | -0.0001390    | 0.000009   | 0.0000824  |
| 105 | -4251.71761930 | -115693.48813877 | 0.0002342     | -0.0001487 | -0.0003806 |
| 110 | -4251.71761880 | -115693.48812517 | -0.0000746    | 0.0000483  | 0.0000017  |
| 115 | -4251.71694630 | -115693.46982577 | -0.0086917    | 0.0070095  | -0.0193304 |
| 120 | -4251.71761840 | -115693.48811428 | 0.0001522     | -0.0001454 | -0.0003547 |
| 125 | -4251.71693310 | -115693.46946658 | -0.0026414    | 0.0023603  | -0.0311241 |

**Table S5.** The transition dipole moment of  $x$  ( $\mu_x$ ),  $y$  ( $\mu_y$ ) and  $z$  orientations ( $\mu_z$ ) (a.u.), the resultant transition dipole moment  $\mu_{tr}$  (a.u.) and orbital energy difference  $\Delta E$  (eV), and the electronic coupling values of each states  $V$  (eV), afterwards calculated the total electronic coupling values  $V_{total}$  (eV).

| $V-6.5 \text{ \AA}$ | States | $\mu_x$ | $\mu_y$ | $\mu_z$ | Dip.S | $\mu_{tr}$ | $OSC$ | $\Delta E$ | $V$  | $V_{total}$ |
|---------------------|--------|---------|---------|---------|-------|------------|-------|------------|------|-------------|
| <b>DNBDC1</b>       | 1      | 0.00    | 0.00    | 0.00    | 0.00  | 0.00       | 0.00  | 2.63       | 0.00 | <b>4.00</b> |
|                     | 2      | -3.38   | -0.27   | -0.54   | 11.82 | 3.44       | 0.78  | 2.68       | 1.34 |             |
|                     | 3      | 0.00    | 0.00    | 0.00    | 0.00  | 0.00       | 0.00  | 2.73       | 0.00 |             |
|                     | 4      | -0.06   | 0.23    | -0.04   | 0.06  | 0.24       | 0.00  | 2.81       | 1.41 |             |
|                     | 5      | 0.00    | 0.00    | 0.00    | 0.00  | 0.00       | 0.00  | 2.96       | 0.00 |             |
|                     | 6      | -0.54   | -0.10   | -0.46   | 0.51  | 0.72       | 0.04  | 2.99       | 1.49 |             |
|                     | 7      | -0.20   | -0.07   | -0.03   | 0.04  | 0.21       | 0.00  | 3.28       | 1.64 |             |
|                     | 8      | 0.04    | -0.21   | 0.04    | 0.05  | 0.22       | 0.00  | 3.33       | 1.67 |             |
|                     | 9      | 0.00    | 0.00    | 0.00    | 0.00  | 0.00       | 0.00  | 3.36       | 0.00 |             |
|                     | 10     | 0.00    | 0.00    | 0.00    | 0.00  | 0.00       | 0.00  | 3.38       | 0.00 |             |
|                     | 11     | -0.11   | 0.82    | -0.03   | 0.68  | 0.82       | 0.06  | 3.47       | 1.74 |             |
|                     | 12     | 0.00    | 0.00    | 0.00    | 0.00  | 0.00       | 0.00  | 3.48       | 0.00 |             |
|                     | 13     | 0.00    | 0.00    | 0.00    | 0.00  | 0.00       | 0.00  | 3.49       | 0.00 |             |
|                     | 14     | 3.15    | 0.11    | 0.25    | 9.96  | 3.16       | 0.90  | 3.67       | 1.83 |             |
|                     | 15     | 0.00    | 0.00    | 0.00    | 0.00  | 0.00       | 0.00  | 3.72       | 0.00 |             |
|                     | 16     | 1.49    | 0.16    | 0.07    | 2.26  | 1.50       | 0.21  | 3.73       | 1.86 |             |
|                     | 17     | 0.00    | 0.00    | 0.00    | 0.00  | 0.00       | 0.00  | 3.77       | 0.00 |             |
|                     | 18     | 2.12    | 0.28    | 0.54    | 4.86  | 2.21       | 0.45  | 3.77       | 1.88 |             |
|                     | 19     | 0.42    | -0.08   | 0.05    | 0.18  | 0.43       | 0.02  | 3.89       | 1.94 |             |
|                     | 20     | 2.51    | 0.21    | 0.85    | 7.07  | 2.66       | 0.68  | 3.92       | 1.96 |             |
| <b>DNBDC2</b>       | 1      | -2.26   | 0.34    | -0.19   | 5.28  | 2.30       | 0.37  | 2.84       | 1.42 | <b>4.30</b> |
|                     | 2      | 3.13    | 0.22    | 0.40    | 10.02 | 3.16       | 0.70  | 2.84       | 1.42 |             |
|                     | 3      | -0.72   | -0.47   | -0.35   | 0.87  | 0.93       | 0.07  | 3.09       | 1.54 |             |
|                     | 4      | 0.19    | -0.20   | 0.09    | 0.08  | 0.29       | 0.01  | 3.16       | 1.58 |             |
|                     | 5      | 0.14    | -0.82   | 0.17    | 0.72  | 0.85       | 0.06  | 3.18       | 1.59 |             |
|                     | 6      | 0.21    | -0.05   | 0.09    | 0.06  | 0.23       | 0.00  | 3.28       | 1.64 |             |
|                     | 7      | -0.05   | 0.18    | -0.25   | 0.10  | 0.32       | 0.01  | 3.34       | 1.67 |             |
|                     | 8      | 0.09    | -0.37   | 0.00    | 0.14  | 0.38       | 0.01  | 3.37       | 1.68 |             |
|                     | 9      | 0.12    | 0.69    | 0.08    | 0.50  | 0.71       | 0.04  | 3.40       | 1.70 |             |
|                     | 10     | -0.52   | 0.29    | 0.09    | 0.37  | 0.61       | 0.03  | 3.45       | 1.73 |             |
|                     | 11     | 0.10    | 0.10    | -0.07   | 0.03  | 0.16       | 0.00  | 3.62       | 1.81 |             |
|                     | 12     | 0.66    | 0.12    | 0.26    | 0.51  | 0.72       | 0.05  | 3.66       | 1.83 |             |
|                     | 13     | 0.06    | 0.19    | -0.10   | 0.05  | 0.23       | 0.00  | 3.68       | 1.84 |             |
|                     | 14     | -1.10   | 0.35    | -0.15   | 1.35  | 1.16       | 0.12  | 3.71       | 1.86 |             |
|                     | 15     | -0.75   | 0.58    | -0.11   | 0.91  | 0.95       | 0.08  | 3.74       | 1.87 |             |
|                     | 16     | -2.98   | -0.23   | -0.47   | 9.16  | 3.03       | 0.84  | 3.75       | 1.88 |             |
|                     | 17     | -4.24   | 0.00    | -0.45   | 18.21 | 4.27       | 1.70  | 3.82       | 1.91 |             |
|                     | 18     | -0.64   | 0.25    | -0.03   | 0.47  | 0.68       | 0.04  | 3.88       | 1.94 |             |

|                |    |       |       |       |       |      |      |      |      |             |
|----------------|----|-------|-------|-------|-------|------|------|------|------|-------------|
|                | 19 | -1.03 | -0.49 | -0.11 | 1.32  | 1.15 | 0.13 | 3.93 | 1.96 |             |
|                | 20 | -0.78 | 0.35  | -0.36 | 0.86  | 0.93 | 0.08 | 3.96 | 1.98 |             |
| <b>DNBDC3</b>  | 1  | -0.01 | 0.01  | 0.00  | 0.00  | 0.01 | 0.00 | 2.76 | 1.38 | <b>3.79</b> |
|                | 2  | 0.53  | -1.82 | -0.01 | 3.59  | 1.89 | 0.25 | 2.79 | 1.40 |             |
|                | 3  | 4.17  | 0.23  | -0.33 | 17.52 | 4.19 | 1.21 | 2.82 | 1.41 |             |
|                | 4  | 0.16  | 0.03  | -0.01 | 0.03  | 0.16 | 0.00 | 2.83 | 1.41 |             |
|                | 5  | -0.25 | -0.14 | 0.19  | 0.12  | 0.34 | 0.01 | 2.94 | 1.47 |             |
|                | 6  | 0.01  | 0.00  | 0.00  | 0.00  | 0.00 | 0.00 | 2.99 | 0.00 |             |
|                | 7  | 0.00  | -0.01 | 0.00  | 0.00  | 0.00 | 0.00 | 3.08 | 0.00 |             |
|                | 8  | -0.42 | 0.06  | 0.52  | 0.45  | 0.67 | 0.03 | 3.14 | 1.57 |             |
|                | 9  | 0.28  | 0.54  | -0.03 | 0.37  | 0.61 | 0.03 | 3.39 | 1.69 |             |
|                | 10 | 0.00  | 0.00  | 0.00  | 0.00  | 0.00 | 0.00 | 3.44 | 0.00 |             |
|                | 11 | 0.00  | 0.00  | 0.00  | 0.00  | 0.00 | 0.00 | 3.52 | 0.00 |             |
|                | 12 | 0.00  | 0.00  | 0.00  | 0.00  | 0.00 | 0.00 | 3.56 | 0.00 |             |
|                | 13 | -0.13 | -0.14 | 0.19  | 0.07  | 0.27 | 0.01 | 3.60 | 1.80 |             |
|                | 14 | 0.00  | -0.01 | 0.00  | 0.00  | 0.00 | 0.00 | 3.64 | 0.00 |             |
|                | 15 | 0.51  | -0.43 | -0.12 | 0.46  | 0.68 | 0.04 | 3.66 | 1.83 |             |
|                | 16 | 0.07  | -0.01 | -0.01 | 0.01  | 0.07 | 0.00 | 3.67 | 1.83 |             |
|                | 17 | 2.78  | -0.75 | -0.35 | 8.41  | 2.90 | 0.76 | 3.68 | 1.84 |             |
|                | 18 | 6.57  | 0.68  | -0.68 | 44.05 | 6.64 | 3.99 | 3.70 | 1.85 |             |
|                | 19 | 0.02  | 0.02  | 0.00  | 0.00  | 0.03 | 0.00 | 3.80 | 1.90 |             |
|                | 20 | 0.49  | -1.63 | -0.07 | 2.90  | 1.70 | 0.27 | 3.82 | 1.91 |             |
| <b>DNBDC4a</b> | 1  | 0.00  | -0.07 | -0.01 | 0.00  | 0.07 | 0.00 | 2.53 | 1.26 | <b>3.09</b> |
|                | 2  | 0.31  | -1.59 | 0.07  | 2.61  | 1.62 | 0.17 | 2.60 | 1.30 |             |
|                | 3  | 0.11  | -0.12 | -0.01 | 0.03  | 0.16 | 0.00 | 2.68 | 1.34 |             |
|                | 4  | 0.22  | -0.52 | 0.10  | 0.33  | 0.57 | 0.02 | 2.69 | 1.34 |             |
|                | 5  | 0.73  | 0.32  | 0.17  | 0.67  | 0.82 | 0.05 | 2.81 | 1.40 |             |
|                | 6  | -0.16 | -0.04 | -0.02 | 0.03  | 0.17 | 0.00 | 2.82 | 1.41 |             |
|                | 7  | 1.92  | 0.15  | 0.23  | 3.75  | 1.94 | 0.26 | 2.85 | 1.42 |             |
|                | 8  | -0.08 | -0.01 | -0.02 | 0.01  | 0.09 | 0.00 | 2.87 | 1.43 |             |
|                | 9  | 0.03  | 0.00  | -0.01 | 0.00  | 0.04 | 0.00 | 3.20 | 1.60 |             |
|                | 10 | 0.04  | -0.01 | -0.01 | 0.00  | 0.04 | 0.00 | 3.25 | 1.62 |             |
|                | 11 | -0.27 | 0.01  | 0.03  | 0.08  | 0.28 | 0.01 | 3.26 | 1.63 |             |
|                | 12 | 0.02  | -0.01 | -0.01 | 0.00  | 0.02 | 0.00 | 3.28 | 1.64 |             |
|                | 13 | 0.12  | 0.08  | 0.02  | 0.02  | 0.14 | 0.00 | 3.28 | 1.64 |             |
|                | 14 | 0.53  | 0.20  | 0.34  | 0.43  | 0.66 | 0.04 | 3.30 | 1.65 |             |
|                | 15 | -1.57 | -0.25 | -0.15 | 2.55  | 1.60 | 0.21 | 3.38 | 1.69 |             |
|                | 16 | -0.49 | -0.06 | -0.08 | 0.25  | 0.50 | 0.02 | 3.43 | 1.72 |             |
|                | 17 | -3.78 | -0.43 | -0.55 | 14.81 | 3.85 | 1.25 | 3.44 | 1.72 |             |
|                | 18 | -0.04 | 0.00  | -0.01 | 0.00  | 0.04 | 0.00 | 3.44 | 1.72 |             |
|                | 19 | -0.88 | 0.03  | -0.25 | 0.85  | 0.92 | 0.07 | 3.60 | 1.80 |             |
|                | 20 | 0.06  | 0.00  | 0.00  | 0.00  | 0.06 | 0.00 | 3.64 | 1.82 |             |
| <b>DNBDC4b</b> | 1  | 0.12  | -1.72 | 0.00  | 2.97  | 1.72 | 0.17 | 2.34 | 1.17 | <b>3.40</b> |
|                | 2  | -0.16 | -0.51 | -0.01 | 0.29  | 0.54 | 0.02 | 2.35 | 1.18 |             |
|                | 3  | -1.13 | -0.31 | 0.07  | 1.39  | 1.18 | 0.09 | 2.52 | 1.26 |             |

|               |    |       |       |       |       |      |      |      |      |             |
|---------------|----|-------|-------|-------|-------|------|------|------|------|-------------|
|               | 4  | 0.52  | -0.57 | -0.05 | 0.60  | 0.77 | 0.04 | 2.54 | 1.27 |             |
|               | 5  | -3.56 | 0.04  | 0.10  | 12.66 | 3.56 | 0.86 | 2.76 | 1.38 |             |
|               | 6  | 1.56  | 0.05  | -0.01 | 2.45  | 1.56 | 0.17 | 2.78 | 1.39 |             |
|               | 7  | 0.27  | 0.29  | -0.12 | 0.17  | 0.41 | 0.01 | 2.94 | 1.47 |             |
|               | 8  | -0.94 | -0.17 | 0.51  | 1.17  | 1.08 | 0.09 | 3.00 | 1.50 |             |
|               | 9  | -0.42 | 0.32  | 0.32  | 0.38  | 0.61 | 0.03 | 3.06 | 1.53 |             |
|               | 10 | 0.08  | -0.07 | 0.26  | 0.08  | 0.29 | 0.01 | 3.16 | 1.58 |             |
|               | 11 | 0.04  | -0.28 | 0.03  | 0.08  | 0.28 | 0.01 | 3.28 | 1.64 |             |
|               | 12 | -0.07 | -0.15 | -0.06 | 0.03  | 0.18 | 0.00 | 3.32 | 1.66 |             |
|               | 13 | -0.13 | -0.54 | -0.04 | 0.30  | 0.55 | 0.03 | 3.36 | 1.68 |             |
|               | 14 | -0.56 | 0.33  | -0.11 | 0.44  | 0.66 | 0.04 | 3.43 | 1.71 |             |
|               | 15 | -0.25 | 0.42  | 0.12  | 0.26  | 0.51 | 0.02 | 3.44 | 1.72 |             |
|               | 16 | 0.04  | 0.56  | -0.07 | 0.32  | 0.56 | 0.03 | 3.46 | 1.73 |             |
|               | 17 | 2.33  | -0.14 | -0.16 | 5.46  | 2.34 | 0.47 | 3.51 | 1.75 |             |
|               | 18 | -6.58 | -0.04 | 0.50  | 43.48 | 6.59 | 3.77 | 3.54 | 1.77 |             |
|               | 19 | 0.56  | 0.68  | -0.12 | 0.80  | 0.89 | 0.07 | 3.57 | 1.79 |             |
|               | 20 | 0.84  | 0.84  | -0.09 | 1.42  | 1.19 | 0.13 | 3.61 | 1.80 |             |
| <b>DNBDC5</b> | 1  | -0.03 | -0.61 | -0.02 | 0.37  | 0.61 | 0.02 | 1.93 | 0.96 | <b>2.60</b> |
|               | 2  | -0.03 | -1.83 | 0.06  | 3.37  | 1.84 | 0.16 | 1.93 | 0.97 |             |
|               | 3  | 0.06  | 0.20  | 0.02  | 0.04  | 0.21 | 0.00 | 2.15 | 1.07 |             |
|               | 4  | 0.40  | 0.79  | 0.06  | 0.79  | 0.89 | 0.04 | 2.17 | 1.09 |             |
|               | 5  | 3.69  | -0.12 | 0.15  | 13.65 | 3.69 | 0.88 | 2.64 | 1.32 |             |
|               | 6  | -0.90 | 0.01  | -0.03 | 0.81  | 0.90 | 0.05 | 2.66 | 1.33 |             |
|               | 7  | 0.13  | -0.01 | 0.00  | 0.02  | 0.13 | 0.00 | 2.77 | 1.39 |             |
|               | 8  | 0.77  | -0.03 | 0.03  | 0.59  | 0.77 | 0.04 | 2.84 | 1.42 |             |
|               | 9  | -1.34 | 0.04  | 0.18  | 1.82  | 1.35 | 0.13 | 2.85 | 1.43 |             |
|               | 10 | 1.62  | 0.04  | -0.72 | 3.13  | 1.77 | 0.22 | 2.87 | 1.43 |             |
|               | 11 | 0.04  | 0.01  | -0.04 | 0.00  | 0.06 | 0.00 | 2.95 | 1.47 |             |
|               | 12 | 0.00  | 0.25  | 0.10  | 0.07  | 0.26 | 0.01 | 2.98 | 1.49 |             |
|               | 13 | 0.04  | 0.00  | 0.01  | 0.00  | 0.05 | 0.00 | 3.09 | 1.54 |             |
|               | 14 | 0.55  | -0.29 | 0.02  | 0.39  | 0.62 | 0.03 | 3.16 | 1.58 |             |
|               | 15 | 0.03  | 0.01  | -0.01 | 0.00  | 0.03 | 0.00 | 3.19 | 1.60 |             |
|               | 16 | 0.59  | 0.22  | 0.19  | 0.43  | 0.66 | 0.03 | 3.30 | 1.65 |             |
|               | 17 | -0.23 | -0.04 | -0.04 | 0.05  | 0.23 | 0.00 | 3.30 | 1.65 |             |
|               | 18 | 0.79  | 0.40  | -0.13 | 0.80  | 0.90 | 0.07 | 3.33 | 1.67 |             |
|               | 19 | 0.16  | 0.07  | -0.01 | 0.03  | 0.17 | 0.00 | 3.35 | 1.68 |             |
|               | 20 | 0.02  | -0.03 | 0.03  | 0.00  | 0.05 | 0.00 | 3.38 | 1.69 |             |

**Table S6.** The calculated reorganization energy  $\lambda$ (eV) for **DNBDC1~ DNBDC5**.

|                | $E(M)$   | $E(M^+)$ | $E^+(M^+)$ | $E^+(M)$ | EEP  | EAV  | $\lambda$ |
|----------------|----------|----------|------------|----------|------|------|-----------|
| <b>DNBDC1</b>  | -2123.88 | -2123.92 | -2123.92   | -2123.88 | 0.04 | 0.03 | 0.24      |
| <b>DNBDC2</b>  | -2277.35 | -2277.38 | -2277.39   | -2277.34 | 0.04 | 0.04 | 0.22      |
| <b>DNBDC3</b>  | -2430.80 | -2430.84 | -2430.85   | -2430.80 | 0.05 | 0.04 | 0.22      |
| <b>DNBDC4a</b> | -2506.93 | -2506.97 | -2506.97   | -2506.92 | 0.05 | 0.04 | 0.24      |
| <b>DNBDC4b</b> | -2584.25 | -2584.31 | -2584.31   | -2584.25 | 0.06 | 0.05 | 0.21      |
| <b>DNBDC5</b>  | -2737.70 | -2737.76 | -2737.77   | -2737.70 | 0.07 | 0.06 | 0.20      |

**Table S7.** The calculated charge hopping rates for **DNBDC1~ DNBDC5** at 6.5 Å, 8.5 Å and 14.9 Å by Marcus semi-classical equation.

|        |       | <b>DNBDC1</b>         | <b>DNBDC2</b>         | <b>DNBDC3</b>         | <b>DNBDC4a</b>        | <b>DNBDC4b</b>        | <b>DNBDC5</b>         |
|--------|-------|-----------------------|-----------------------|-----------------------|-----------------------|-----------------------|-----------------------|
| 6.5 Å  | $k_1$ | $5.45 \times 10^{16}$ | $7.86 \times 10^{16}$ | $6.20 \times 10^{16}$ | $3.34 \times 10^{16}$ | $5.42 \times 10^{16}$ | $3.54 \times 10^{16}$ |
| 8.5 Å  | $k_2$ | $2.09 \times 10^{16}$ | $6.44 \times 10^{16}$ | $5.71 \times 10^{16}$ | $1.32 \times 10^{16}$ | $4.31 \times 10^{16}$ | $2.91 \times 10^{16}$ |
| 14.9 Å | $k_3$ | $6.14 \times 10^{16}$ | $1.03 \times 10^{17}$ | $1.05 \times 10^{17}$ | $3.18 \times 10^{16}$ | $7.31 \times 10^{16}$ | $4.00 \times 10^{16}$ |

**Table S8.** The transition dipole moment of  $x$  ( $\mu_x$ ),  $y$  ( $\mu_y$ ) and  $z$  orientations ( $\mu_z$ ) (a.u.), the resultant transition dipole moment  $\mu_{tr}$  (a.u.) and orbital energy difference  $\Delta E$  (eV), and the electronic coupling values of each states  $V$  (eV), afterwards calculated the total electronic coupling values  $V_{total}$  (eV) at  $8.5 \text{ \AA}$ .

| $V_2-8.5 \text{ \AA}$ | States | $\mu_x$ | $\mu_y$ | $\mu_z$ | Dip.S | $\mu_{tr}$ | OSC  | $E$  | $V$  | $V_{total}$ |
|-----------------------|--------|---------|---------|---------|-------|------------|------|------|------|-------------|
| <b>DNBDC1</b>         | 1      | -0.32   | -1.52   | 0.04    | 2.40  | 1.55       | 0.08 | 1.31 | 0.66 | <b>2.48</b> |
|                       | 2      | 0.00    | 0.04    | 0.01    | 0.00  | 0.04       | 0.00 | 1.62 | 0.81 |             |
|                       | 3      | -0.01   | 0.02    | 0.00    | 0.00  | 0.02       | 0.00 | 1.87 | 0.93 |             |
|                       | 4      | 0.01    | 0.06    | -0.02   | 0.00  | 0.06       | 0.00 | 2.14 | 1.07 |             |
|                       | 5      | -0.17   | 1.35    | 0.02    | 1.86  | 1.36       | 0.10 | 2.19 | 1.10 |             |
|                       | 6      | 0.05    | 0.03    | 0.00    | 0.00  | 0.06       | 0.00 | 2.42 | 1.21 |             |
|                       | 7      | -0.22   | 0.03    | 0.01    | 0.05  | 0.23       | 0.00 | 2.60 | 1.30 |             |
|                       | 8      | 3.73    | -0.20   | -0.22   | 14.01 | 3.74       | 0.90 | 2.62 | 1.31 |             |
|                       | 9      | 2.53    | 0.12    | 0.43    | 6.60  | 2.57       | 0.43 | 2.68 | 1.34 |             |
|                       | 10     | -0.69   | 0.03    | -0.55   | 0.79  | 0.89       | 0.05 | 2.70 | 1.35 |             |
|                       | 11     | -0.12   | 0.07    | 0.00    | 0.02  | 0.14       | 0.00 | 2.75 | 1.37 |             |
|                       | 12     | 0.16    | -0.35   | -0.28   | 0.22  | 0.47       | 0.02 | 2.76 | 1.38 |             |
|                       | 13     | -0.33   | 0.41    | -0.05   | 0.28  | 0.53       | 0.02 | 2.90 | 1.45 |             |
|                       | 14     | -0.06   | 0.05    | 0.01    | 0.01  | 0.08       | 0.00 | 2.91 | 1.46 |             |
|                       | 15     | 0.05    | 0.00    | 0.00    | 0.00  | 0.05       | 0.00 | 2.98 | 1.49 |             |
|                       | 16     | -0.26   | -0.07   | -0.02   | 0.07  | 0.27       | 0.01 | 3.07 | 1.53 |             |
|                       | 17     | -0.80   | -0.30   | -0.08   | 0.74  | 0.86       | 0.06 | 3.09 | 1.54 |             |
|                       | 18     | 0.81    | -0.09   | 0.05    | 0.67  | 0.82       | 0.05 | 3.11 | 1.56 |             |
|                       | 19     | -0.62   | -0.50   | -0.08   | 0.64  | 0.80       | 0.05 | 3.20 | 1.60 |             |
|                       | 20     | -3.74   | -0.87   | -0.29   | 14.83 | 3.85       | 1.18 | 3.26 | 1.63 |             |
| <b>DNBDC2</b>         | 1      | -0.36   | 0.02    | 0.05    | 0.14  | 0.37       | 0.01 | 2.59 | 1.30 | <b>3.90</b> |
|                       | 2      | -3.82   | 0.18    | 0.63    | 15.05 | 3.88       | 0.99 | 2.68 | 1.34 |             |
|                       | 3      | 0.16    | -0.44   | -0.03   | 0.22  | 0.47       | 0.02 | 2.91 | 1.45 |             |
|                       | 4      | 0.46    | 0.01    | -0.06   | 0.21  | 0.46       | 0.02 | 2.95 | 1.48 |             |
|                       | 5      | -0.33   | -0.03   | 0.04    | 0.11  | 0.33       | 0.01 | 2.97 | 1.48 |             |
|                       | 6      | 0.16    | 0.87    | -0.05   | 0.78  | 0.89       | 0.06 | 3.06 | 1.53 |             |
|                       | 7      | -0.03   | -0.19   | 0.03    | 0.04  | 0.19       | 0.00 | 3.14 | 1.57 |             |
|                       | 8      | -0.23   | -0.77   | -0.03   | 0.65  | 0.81       | 0.05 | 3.19 | 1.59 |             |
|                       | 9      | -0.08   | -0.58   | 0.07    | 0.35  | 0.59       | 0.03 | 3.20 | 1.60 |             |
|                       | 10     | -0.38   | -0.60   | 0.02    | 0.50  | 0.71       | 0.04 | 3.37 | 1.69 |             |
|                       | 11     | -0.10   | 0.20    | 0.01    | 0.05  | 0.22       | 0.00 | 3.54 | 1.77 |             |
|                       | 12     | -0.49   | -0.01   | 0.04    | 0.25  | 0.50       | 0.02 | 3.56 | 1.78 |             |
|                       | 13     | -1.29   | 0.03    | 0.16    | 1.70  | 1.30       | 0.15 | 3.62 | 1.81 |             |
|                       | 14     | -3.25   | 0.22    | 0.53    | 10.91 | 3.30       | 0.97 | 3.64 | 1.82 |             |
|                       | 15     | -0.45   | -0.10   | 0.07    | 0.22  | 0.47       | 0.02 | 3.65 | 1.82 |             |
|                       | 16     | -5.16   | 0.24    | 0.73    | 27.27 | 5.22       | 2.46 | 3.68 | 1.84 |             |
|                       | 17     | 1.41    | -0.01   | -0.22   | 2.02  | 1.42       | 0.18 | 3.70 | 1.85 |             |
|                       | 18     | 0.53    | 0.21    | -0.08   | 0.33  | 0.58       | 0.03 | 3.73 | 1.87 |             |



|                |    |       |       |       |       |      |      |      |      |             |
|----------------|----|-------|-------|-------|-------|------|------|------|------|-------------|
|                | 19 | -0.83 | -0.13 | 0.29  | 0.78  | 0.89 | 0.07 | 3.86 | 1.93 |             |
|                | 20 | -0.38 | 0.44  | 0.20  | 0.38  | 0.62 | 0.04 | 3.89 | 1.94 |             |
| <b>DNBDC3</b>  | 1  | -0.03 | -1.58 | 0.01  | 2.49  | 1.58 | 0.15 | 2.51 | 1.26 | <b>3.64</b> |
|                | 2  | 0.00  | -0.02 | 0.00  | 0.00  | 0.02 | 0.00 | 2.56 | 1.28 |             |
|                | 3  | -0.02 | -0.01 | -0.01 | 0.00  | 0.02 | 0.00 | 2.59 | 1.29 |             |
|                | 4  | -4.13 | 0.04  | 0.61  | 17.41 | 4.17 | 1.16 | 2.72 | 1.36 |             |
|                | 5  | 0.03  | 0.28  | 0.00  | 0.08  | 0.28 | 0.01 | 2.83 | 1.41 |             |
|                | 6  | 0.10  | 1.03  | -0.01 | 1.07  | 1.04 | 0.08 | 2.85 | 1.43 |             |
|                | 7  | -0.40 | 0.04  | -0.17 | 0.19  | 0.44 | 0.01 | 3.00 | 1.50 |             |
|                | 8  | 0.05  | 0.00  | 0.01  | 0.00  | 0.05 | 0.00 | 3.04 | 1.52 |             |
|                | 9  | 0.01  | 0.43  | -0.01 | 0.19  | 0.43 | 0.02 | 3.34 | 1.67 |             |
|                | 10 | -0.11 | -0.38 | 0.02  | 0.16  | 0.40 | 0.01 | 3.39 | 1.70 |             |
|                | 11 | -0.01 | 0.02  | 0.00  | 0.00  | 0.02 | 0.00 | 3.42 | 1.71 |             |
|                | 12 | 0.01  | 0.00  | 0.01  | 0.00  | 0.01 | 0.00 | 3.46 | 1.73 |             |
|                | 13 | -0.08 | -0.04 | 0.01  | 0.01  | 0.09 | 0.00 | 3.50 | 1.75 |             |
|                | 14 | 0.08  | 0.01  | -0.01 | 0.01  | 0.08 | 0.00 | 3.51 | 1.76 |             |
|                | 15 | -0.13 | 0.00  | 0.01  | 0.02  | 0.13 | 0.00 | 3.52 | 1.76 |             |
|                | 16 | 3.35  | -0.04 | -0.44 | 11.45 | 3.38 | 0.99 | 3.54 | 1.77 |             |
|                | 17 | 6.51  | -0.03 | -0.79 | 43.07 | 6.56 | 3.77 | 3.58 | 1.79 |             |
|                | 18 | -0.28 | 0.03  | 0.04  | 0.08  | 0.28 | 0.01 | 3.60 | 1.80 |             |
|                | 19 | 0.00  | 0.68  | 0.00  | 0.46  | 0.68 | 0.04 | 3.72 | 1.86 |             |
|                | 20 | -0.01 | -1.57 | 0.01  | 2.45  | 1.57 | 0.22 | 3.73 | 1.86 |             |
| <b>DNBDC4a</b> | 1  | -0.26 | -1.79 | -0.02 | 3.28  | 1.81 | 0.05 | 0.68 | 0.34 | <b>1.94</b> |
|                | 2  | 0.05  | -0.48 | -0.12 | 0.25  | 0.50 | 0.01 | 1.31 | 0.65 |             |
|                | 3  | 0.60  | -0.22 | 0.31  | 0.50  | 0.71 | 0.02 | 1.36 | 0.68 |             |
|                | 4  | -0.28 | -0.06 | 0.00  | 0.08  | 0.29 | 0.00 | 1.70 | 0.85 |             |
|                | 5  | -0.51 | 0.35  | -0.16 | 0.41  | 0.64 | 0.02 | 1.81 | 0.91 |             |
|                | 6  | -1.21 | -0.12 | -0.24 | 1.54  | 1.24 | 0.07 | 1.94 | 0.97 |             |
|                | 7  | 0.92  | 0.56  | 0.22  | 1.21  | 1.10 | 0.06 | 1.96 | 0.98 |             |
|                | 8  | 1.22  | 0.44  | -0.08 | 1.70  | 1.30 | 0.09 | 2.11 | 1.05 |             |
|                | 9  | 0.51  | 0.72  | 0.10  | 0.78  | 0.88 | 0.04 | 2.26 | 1.13 |             |
|                | 10 | 0.55  | -0.50 | 0.09  | 0.55  | 0.74 | 0.03 | 2.27 | 1.14 |             |
|                | 11 | -1.14 | 0.44  | 0.01  | 1.49  | 1.22 | 0.09 | 2.34 | 1.17 |             |
|                | 12 | 0.34  | 1.03  | 0.05  | 1.18  | 1.09 | 0.07 | 2.42 | 1.21 |             |
|                | 13 | -0.16 | -0.37 | -0.02 | 0.16  | 0.40 | 0.01 | 2.44 | 1.22 |             |
|                | 14 | -0.11 | -0.98 | -0.17 | 1.00  | 1.00 | 0.06 | 2.48 | 1.24 |             |
|                | 15 | 0.26  | 0.22  | -0.15 | 0.14  | 0.37 | 0.01 | 2.53 | 1.27 |             |
|                | 16 | -0.27 | -0.32 | 0.11  | 0.19  | 0.43 | 0.01 | 2.54 | 1.27 |             |
|                | 17 | 0.46  | -0.13 | 0.03  | 0.23  | 0.48 | 0.01 | 2.60 | 1.30 |             |
|                | 18 | -0.48 | -1.73 | -0.06 | 3.22  | 1.80 | 0.21 | 2.70 | 1.35 |             |
|                | 19 | 0.72  | 0.48  | -0.31 | 0.85  | 0.92 | 0.06 | 2.75 | 1.38 |             |
|                | 20 | -0.19 | 0.26  | -0.12 | 0.12  | 0.34 | 0.01 | 2.80 | 1.40 |             |
| <b>DNBDC4b</b> | 1  | -0.11 | 1.41  | 0.00  | 1.99  | 1.41 | 0.09 | 1.83 | 0.91 | <b>3.04</b> |
|                | 2  | 0.01  | -0.18 | 0.01  | 0.03  | 0.18 | 0.00 | 2.05 | 1.03 |             |
|                | 3  | 0.03  | 0.14  | -0.01 | 0.02  | 0.14 | 0.00 | 2.29 | 1.15 |             |

|               |    |       |       |       |       |      |      |      |      |             |
|---------------|----|-------|-------|-------|-------|------|------|------|------|-------------|
|               | 4  | 0.11  | 0.00  | -0.08 | 0.02  | 0.13 | 0.00 | 2.36 | 1.18 |             |
|               | 5  | -0.10 | -1.33 | -0.01 | 1.78  | 1.33 | 0.11 | 2.51 | 1.25 |             |
|               | 6  | 4.23  | 0.03  | 0.40  | 18.04 | 4.25 | 1.19 | 2.69 | 1.34 |             |
|               | 7  | -0.47 | -0.13 | 0.41  | 0.40  | 0.64 | 0.03 | 2.83 | 1.41 |             |
|               | 8  | -0.13 | -0.14 | 0.13  | 0.05  | 0.23 | 0.00 | 2.88 | 1.44 |             |
|               | 9  | 0.04  | -0.07 | -0.02 | 0.01  | 0.08 | 0.00 | 2.92 | 1.46 |             |
|               | 10 | -0.08 | 0.14  | -0.09 | 0.03  | 0.19 | 0.00 | 2.98 | 1.49 |             |
|               | 11 | 0.27  | 0.32  | 0.03  | 0.18  | 0.42 | 0.01 | 3.12 | 1.56 |             |
|               | 12 | -0.26 | 0.41  | -0.04 | 0.23  | 0.48 | 0.02 | 3.17 | 1.59 |             |
|               | 13 | 0.03  | 0.52  | -0.03 | 0.27  | 0.52 | 0.02 | 3.19 | 1.60 |             |
|               | 14 | -0.31 | 0.43  | -0.01 | 0.28  | 0.53 | 0.02 | 3.25 | 1.62 |             |
|               | 15 | 0.05  | -0.26 | -0.06 | 0.07  | 0.27 | 0.01 | 3.30 | 1.65 |             |
|               | 16 | -1.04 | -0.08 | -0.05 | 1.08  | 1.04 | 0.09 | 3.33 | 1.66 |             |
|               | 17 | -0.11 | 0.04  | 0.02  | 0.01  | 0.11 | 0.00 | 3.39 | 1.69 |             |
|               | 18 | -6.21 | -0.05 | -0.56 | 38.82 | 6.23 | 3.24 | 3.40 | 1.70 |             |
|               | 19 | 1.78  | -0.64 | 0.19  | 3.59  | 1.89 | 0.30 | 3.43 | 1.71 |             |
|               | 20 | -2.39 | -1.00 | -0.16 | 6.75  | 2.60 | 0.58 | 3.48 | 1.74 |             |
| <b>DNBDC5</b> | 1  | -0.32 | -1.52 | 0.04  | 2.40  | 1.55 | 0.08 | 1.31 | 0.66 | <b>2.36</b> |
|               | 2  | 0.00  | 0.04  | 0.01  | 0.00  | 0.04 | 0.00 | 1.62 | 0.81 |             |
|               | 3  | -0.01 | 0.02  | 0.00  | 0.00  | 0.02 | 0.00 | 1.87 | 0.93 |             |
|               | 4  | 0.01  | 0.06  | -0.02 | 0.00  | 0.06 | 0.00 | 2.14 | 1.07 |             |
|               | 5  | -0.17 | 1.35  | 0.02  | 1.86  | 1.36 | 0.10 | 2.19 | 1.10 |             |
|               | 6  | 0.05  | 0.03  | 0.00  | 0.00  | 0.06 | 0.00 | 2.42 | 1.21 |             |
|               | 7  | -0.22 | 0.03  | 0.01  | 0.05  | 0.23 | 0.00 | 2.60 | 1.30 |             |
|               | 8  | 3.73  | -0.20 | -0.22 | 14.01 | 3.74 | 0.90 | 2.62 | 1.31 |             |
|               | 9  | 2.53  | 0.12  | 0.43  | 6.60  | 2.57 | 0.43 | 2.68 | 1.34 |             |
|               | 10 | -0.69 | 0.03  | -0.55 | 0.79  | 0.89 | 0.05 | 2.70 | 1.35 |             |
|               | 11 | -0.12 | 0.07  | 0.00  | 0.02  | 0.14 | 0.00 | 2.75 | 1.37 |             |
|               | 12 | 0.16  | -0.35 | -0.28 | 0.22  | 0.47 | 0.02 | 2.76 | 1.38 |             |
|               | 13 | -0.33 | 0.41  | -0.05 | 0.28  | 0.53 | 0.02 | 2.90 | 1.45 |             |
|               | 14 | -0.06 | 0.05  | 0.01  | 0.01  | 0.08 | 0.00 | 2.91 | 1.46 |             |
|               | 15 | 0.05  | 0.00  | 0.00  | 0.00  | 0.05 | 0.00 | 2.98 | 1.49 |             |
|               | 16 | -0.26 | -0.07 | -0.02 | 0.07  | 0.27 | 0.01 | 3.07 | 1.53 |             |
|               | 17 | -0.80 | -0.30 | -0.08 | 0.74  | 0.86 | 0.06 | 3.09 | 1.54 |             |
|               | 18 | 0.81  | -0.09 | 0.05  | 0.67  | 0.82 | 0.05 | 3.11 | 1.56 |             |
|               | 19 | -0.62 | -0.50 | -0.08 | 0.64  | 0.80 | 0.05 | 3.20 | 1.60 |             |
|               | 20 | -3.74 | -0.87 | -0.29 | 14.83 | 3.85 | 1.18 | 3.26 | 1.63 |             |

**Table S9.** The transition dipole moment of  $x$  ( $\mu_x$ ),  $y$  ( $\mu_y$ ) and  $z$  orientations ( $\mu_z$ ) (a.u.), the resultant transition dipole moment  $\mu_{tr}$  (a.u.) and orbital energy difference  $\Delta E$  (eV), and the electronic coupling values of each states  $V$  (eV), afterwards calculated the total electronic coupling values  $V_{total}$  (eV) at  $14.9 \text{ \AA}$ .

| $V_3-14.9 \text{ \AA}$ | States | $\mu_x$ | $\mu_y$ | $\mu_z$ | Dip.S | $\mu_{tr}$ | OSC  | $E$  | $V$  | $V_{total}$ |
|------------------------|--------|---------|---------|---------|-------|------------|------|------|------|-------------|
| <b>DNBDC1</b>          | 1      | -3.58   | 1.70    | 0.42    | 15.87 | 3.98       | 1.06 | 2.73 | 1.37 | <b>4.25</b> |
|                        | 2      | 0.00    | 0.00    | 0.00    | 0.00  | 0.00       | 0.00 | 2.75 | 0.00 |             |
|                        | 3      | 0.06    | 0.12    | -0.01   | 0.02  | 0.14       | 0.00 | 2.80 | 1.40 |             |
|                        | 4      | 0.12    | 0.26    | -0.01   | 0.08  | 0.28       | 0.01 | 2.80 | 1.40 |             |
|                        | 5      | 0.54    | 0.79    | -0.07   | 0.91  | 0.96       | 0.08 | 3.52 | 1.76 |             |
|                        | 6      | -0.15   | -0.23   | 0.02    | 0.08  | 0.28       | 0.01 | 3.52 | 1.76 |             |
|                        | 7      | -5.06   | 2.32    | 0.58    | 31.31 | 5.60       | 2.87 | 3.75 | 1.87 |             |
|                        | 8      | -0.09   | 0.04    | 0.01    | 0.01  | 0.10       | 0.00 | 3.76 | 1.88 |             |
|                        | 9      | -1.55   | 0.70    | 0.18    | 2.93  | 1.71       | 0.27 | 3.76 | 1.88 |             |
|                        | 10     | -0.07   | 0.03    | 0.01    | 0.01  | 0.07       | 0.00 | 3.79 | 1.89 |             |
|                        | 11     | -0.03   | 0.03    | 0.00    | 0.00  | 0.04       | 0.00 | 3.79 | 1.90 |             |
|                        | 12     | 0.13    | -0.07   | -0.02   | 0.02  | 0.15       | 0.00 | 3.79 | 1.90 |             |
|                        | 13     | -0.10   | 0.06    | 0.02    | 0.01  | 0.12       | 0.00 | 3.96 | 1.98 |             |
|                        | 14     | 0.00    | 0.01    | 0.00    | 0.00  | 0.00       | 0.00 | 3.96 | 0.00 |             |
|                        | 15     | 0.00    | 0.00    | 0.00    | 0.00  | 0.00       | 0.00 | 3.97 | 0.00 |             |
|                        | 16     | -0.01   | 0.00    | 0.00    | 0.00  | 0.01       | 0.00 | 3.98 | 1.99 |             |
|                        | 17     | 0.05    | 0.01    | -0.03   | 0.00  | 0.06       | 0.00 | 4.26 | 2.13 |             |
|                        | 18     | -1.33   | -0.67   | 0.13    | 2.23  | 1.49       | 0.23 | 4.27 | 2.14 |             |
|                        | 19     | 2.29    | -0.55   | -0.28   | 5.62  | 2.37       | 0.59 | 4.28 | 2.14 |             |
|                        | 20     | 0.00    | -0.05   | -0.01   | 0.00  | 0.05       | 0.00 | 4.28 | 2.14 |             |
| <b>DNBDC2</b>          | 1      | 3.85    | -1.56   | -0.38   | 17.40 | 4.17       | 1.15 | 2.70 | 1.35 | <b>4.92</b> |
|                        | 2      | 0.44    | -0.21   | -0.07   | 0.24  | 0.49       | 0.02 | 2.72 | 1.36 |             |
|                        | 3      | -0.23   | -0.42   | 0.03    | 0.23  | 0.48       | 0.02 | 2.97 | 1.49 |             |
|                        | 4      | 0.19    | 0.36    | -0.04   | 0.17  | 0.41       | 0.01 | 2.98 | 1.49 |             |
|                        | 5      | -0.64   | -1.01   | 0.11    | 1.43  | 1.20       | 0.11 | 3.17 | 1.59 |             |
|                        | 6      | 0.42    | 0.84    | -0.09   | 0.88  | 0.94       | 0.07 | 3.17 | 1.59 |             |
|                        | 7      | -1.39   | 0.47    | 0.11    | 2.16  | 1.47       | 0.19 | 3.63 | 1.82 |             |
|                        | 8      | -0.70   | 0.33    | 0.08    | 0.60  | 0.77       | 0.05 | 3.65 | 1.82 |             |
|                        | 9      | 6.59    | -2.49   | -0.65   | 50.03 | 7.07       | 4.51 | 3.68 | 1.84 |             |
|                        | 10     | -1.40   | 0.60    | 0.12    | 2.34  | 1.53       | 0.21 | 3.71 | 1.86 |             |
|                        | 11     | 1.18    | -0.37   | -0.14   | 1.56  | 1.25       | 0.14 | 3.72 | 1.86 |             |
|                        | 12     | -0.49   | 0.28    | 0.08    | 0.33  | 0.57       | 0.03 | 3.73 | 1.87 |             |
|                        | 13     | -0.20   | 0.15    | 0.03    | 0.06  | 0.25       | 0.01 | 3.76 | 1.88 |             |
|                        | 14     | -0.22   | 0.13    | 0.04    | 0.07  | 0.26       | 0.01 | 3.90 | 1.95 |             |
|                        | 15     | -0.17   | 0.02    | 0.05    | 0.03  | 0.17       | 0.00 | 3.91 | 1.96 |             |
|                        | 16     | 0.03    | -0.23   | 0.00    | 0.05  | 0.23       | 0.01 | 3.92 | 1.96 |             |
|                        | 17     | -0.62   | -1.54   | 0.09    | 2.75  | 1.66       | 0.27 | 4.03 | 2.01 |             |

|                |    |       |       |       |       |      |      |      |      |             |
|----------------|----|-------|-------|-------|-------|------|------|------|------|-------------|
|                | 18 | 0.77  | 0.91  | -0.12 | 1.44  | 1.20 | 0.14 | 4.04 | 2.02 |             |
|                | 19 | -0.97 | -1.38 | 0.15  | 2.87  | 1.69 | 0.29 | 4.06 | 2.03 |             |
|                | 20 | 1.79  | -1.43 | -0.15 | 5.25  | 2.29 | 0.52 | 4.07 | 2.04 |             |
| <b>DNBDC3</b>  | 1  | 0.43  | 0.74  | 0.10  | 0.74  | 0.86 | 0.05 | 2.59 | 1.30 | <b>4.05</b> |
|                | 2  | -1.01 | -1.69 | -0.23 | 3.94  | 1.98 | 0.25 | 2.60 | 1.30 |             |
|                | 3  | -4.41 | 1.39  | -0.37 | 21.50 | 4.64 | 1.44 | 2.73 | 1.37 |             |
|                | 4  | 0.16  | -0.05 | 0.02  | 0.03  | 0.17 | 0.00 | 2.75 | 1.38 |             |
|                | 5  | 1.28  | 0.05  | 0.09  | 1.64  | 1.28 | 0.14 | 3.48 | 1.74 |             |
|                | 6  | -1.05 | 0.01  | -0.08 | 1.10  | 1.05 | 0.09 | 3.50 | 1.75 |             |
|                | 7  | 0.94  | 0.20  | 0.12  | 0.94  | 0.97 | 0.08 | 3.51 | 1.76 |             |
|                | 8  | 0.98  | 0.28  | 0.13  | 1.06  | 1.03 | 0.09 | 3.52 | 1.76 |             |
|                | 9  | -0.38 | 0.12  | -0.03 | 0.16  | 0.40 | 0.01 | 3.53 | 1.77 |             |
|                | 10 | -1.07 | 0.45  | -0.12 | 1.36  | 1.17 | 0.12 | 3.54 | 1.77 |             |
|                | 11 | -3.52 | 1.03  | -0.28 | 13.50 | 3.67 | 1.17 | 3.55 | 1.78 |             |
|                | 12 | 0.28  | -0.03 | 0.03  | 0.08  | 0.28 | 0.01 | 3.56 | 1.78 |             |
|                | 13 | 7.35  | -1.97 | 0.66  | 58.29 | 7.63 | 5.13 | 3.59 | 1.79 |             |
|                | 14 | -0.01 | -0.01 | -0.01 | 0.00  | 0.02 | 0.00 | 3.65 | 1.82 |             |
|                | 15 | -0.90 | 2.05  | 0.00  | 4.99  | 2.23 | 0.46 | 3.73 | 1.86 |             |
|                | 16 | 0.15  | -0.57 | -0.02 | 0.35  | 0.59 | 0.03 | 3.73 | 1.86 |             |
|                | 17 | 0.16  | 0.50  | 0.06  | 0.28  | 0.53 | 0.03 | 3.76 | 1.88 |             |
|                | 18 | 0.25  | 0.20  | 0.05  | 0.10  | 0.32 | 0.01 | 3.78 | 1.89 |             |
|                | 19 | -0.07 | 0.08  | -0.01 | 0.01  | 0.11 | 0.00 | 3.84 | 1.92 |             |
|                | 20 | 0.00  | -0.09 | 0.00  | 0.01  | 0.09 | 0.00 | 3.84 | 1.92 |             |
| <b>DNBDC4a</b> | 1  | 0.05  | -0.08 | 0.00  | 0.01  | 0.09 | 0.00 | 2.23 | 1.12 | <b>3.01</b> |
|                | 2  | 1.18  | -1.72 | 0.10  | 4.33  | 2.08 | 0.24 | 2.23 | 1.12 |             |
|                | 3  | 0.07  | -0.13 | 0.00  | 0.02  | 0.14 | 0.00 | 2.27 | 1.14 |             |
|                | 4  | 0.12  | -0.12 | 0.01  | 0.03  | 0.17 | 0.00 | 2.27 | 1.14 |             |
|                | 5  | -2.01 | -0.92 | -0.20 | 4.91  | 2.22 | 0.33 | 2.73 | 1.37 |             |
|                | 6  | -0.06 | -0.03 | 0.00  | 0.00  | 0.06 | 0.00 | 2.74 | 1.37 |             |
|                | 7  | -0.02 | 0.01  | 0.00  | 0.00  | 0.02 | 0.00 | 2.78 | 1.39 |             |
|                | 8  | 0.00  | 0.00  | 0.00  | 0.00  | 0.00 | 0.00 | 2.78 | 0.00 |             |
|                | 9  | -0.08 | -0.02 | 0.00  | 0.01  | 0.08 | 0.00 | 3.16 | 1.58 |             |
|                | 10 | 0.09  | 0.05  | 0.02  | 0.01  | 0.10 | 0.00 | 3.16 | 1.58 |             |
|                | 11 | 0.39  | -0.29 | 0.04  | 0.24  | 0.49 | 0.02 | 3.19 | 1.60 |             |
|                | 12 | 0.32  | -0.21 | 0.03  | 0.15  | 0.39 | 0.01 | 3.20 | 1.60 |             |
|                | 13 | -4.24 | -1.90 | -0.42 | 21.78 | 4.67 | 1.73 | 3.25 | 1.63 |             |
|                | 14 | -0.12 | -0.05 | -0.01 | 0.02  | 0.13 | 0.00 | 3.28 | 1.64 |             |
|                | 15 | 0.07  | 0.03  | 0.01  | 0.01  | 0.08 | 0.00 | 3.29 | 1.65 |             |
|                | 16 | 0.17  | 0.10  | 0.03  | 0.04  | 0.20 | 0.00 | 3.33 | 1.66 |             |
|                | 17 | -0.04 | 0.01  | 0.04  | 0.00  | 0.06 | 0.00 | 3.50 | 1.75 |             |
|                | 18 | 0.16  | -0.04 | 0.01  | 0.03  | 0.16 | 0.00 | 3.51 | 1.75 |             |
|                | 19 | -2.60 | -1.12 | -0.26 | 8.06  | 2.84 | 0.72 | 3.64 | 1.82 |             |
|                | 20 | -0.46 | -0.20 | -0.05 | 0.26  | 0.51 | 0.02 | 3.65 | 1.82 |             |
| <b>DNBDC4b</b> | 1  | -1.98 | 0.45  | 0.05  | 4.13  | 2.03 | 0.06 | 0.56 | 0.28 | <b>3.95</b> |
|                | 2  | 0.01  | -0.92 | -0.14 | 0.87  | 0.93 | 0.01 | 0.60 | 0.30 |             |

|               |    |       |       |       |       |      |      |      |      |             |
|---------------|----|-------|-------|-------|-------|------|------|------|------|-------------|
|               | 3  | -2.72 | 0.14  | 0.02  | 7.40  | 2.72 | 0.26 | 1.45 | 0.73 |             |
|               | 4  | 0.33  | -0.07 | -0.12 | 0.13  | 0.36 | 0.01 | 1.61 | 0.81 |             |
|               | 5  | 0.32  | -0.17 | -0.02 | 0.13  | 0.36 | 0.01 | 2.00 | 1.00 |             |
|               | 6  | -1.27 | 0.23  | -0.04 | 1.68  | 1.30 | 0.09 | 2.07 | 1.04 |             |
|               | 7  | -1.52 | 0.94  | -0.09 | 3.21  | 1.79 | 0.17 | 2.11 | 1.06 |             |
|               | 8  | 0.97  | -0.18 | 0.01  | 0.98  | 0.99 | 0.05 | 2.17 | 1.09 |             |
|               | 9  | -0.33 | -1.80 | 0.21  | 3.39  | 1.84 | 0.18 | 2.19 | 1.10 |             |
|               | 10 | 0.54  | 0.44  | 0.06  | 0.49  | 0.70 | 0.03 | 2.47 | 1.24 |             |
|               | 11 | -0.21 | -0.08 | 0.08  | 0.06  | 0.24 | 0.00 | 2.53 | 1.27 |             |
|               | 12 | -0.17 | 0.01  | 0.01  | 0.03  | 0.18 | 0.00 | 2.64 | 1.32 |             |
|               | 13 | -2.70 | -1.05 | -0.17 | 8.42  | 2.90 | 0.56 | 2.70 | 1.35 |             |
|               | 14 | 3.13  | 0.97  | 0.10  | 10.73 | 3.28 | 0.72 | 2.75 | 1.37 |             |
|               | 15 | 2.74  | 0.72  | 0.05  | 8.02  | 2.83 | 0.55 | 2.81 | 1.40 |             |
|               | 16 | 3.18  | 1.22  | 0.00  | 11.60 | 3.41 | 0.83 | 2.92 | 1.46 |             |
|               | 17 | -0.42 | -0.32 | -0.03 | 0.28  | 0.53 | 0.02 | 3.08 | 1.54 |             |
|               | 18 | -0.53 | 0.03  | 0.00  | 0.28  | 0.53 | 0.02 | 3.11 | 1.56 |             |
|               | 19 | 2.72  | 0.26  | 0.00  | 7.46  | 2.73 | 0.58 | 3.15 | 1.57 |             |
|               | 20 | 0.51  | 1.14  | 0.23  | 1.61  | 1.27 | 0.12 | 3.16 | 1.58 |             |
| <b>DNBDC5</b> | 1  | 2.03  | 0.59  | 0.11  | 4.48  | 2.12 | 0.05 | 0.47 | 0.23 | <b>2.77</b> |
|               | 2  | 1.83  | -0.54 | -0.05 | 3.66  | 1.91 | 0.06 | 0.72 | 0.36 |             |
|               | 3  | -0.24 | 0.40  | 0.03  | 0.22  | 0.47 | 0.01 | 1.09 | 0.54 |             |
|               | 4  | 1.52  | -1.10 | 0.05  | 3.53  | 1.88 | 0.13 | 1.53 | 0.76 |             |
|               | 5  | 1.15  | 1.74  | -0.14 | 4.37  | 2.09 | 0.18 | 1.68 | 0.84 |             |
|               | 6  | 2.97  | 0.50  | -0.11 | 9.07  | 3.01 | 0.41 | 1.83 | 0.92 |             |
|               | 7  | -0.56 | -0.05 | 0.06  | 0.32  | 0.57 | 0.02 | 1.94 | 0.97 |             |
|               | 8  | -0.63 | -0.15 | 0.01  | 0.42  | 0.65 | 0.02 | 2.01 | 1.01 |             |
|               | 9  | -0.06 | -0.12 | -0.05 | 0.02  | 0.14 | 0.00 | 2.27 | 1.14 |             |
|               | 10 | 0.04  | -0.09 | -0.02 | 0.01  | 0.10 | 0.00 | 2.36 | 1.18 |             |
|               | 11 | 0.88  | -0.26 | 0.00  | 0.85  | 0.92 | 0.05 | 2.47 | 1.23 |             |
|               | 12 | 0.13  | -0.18 | -0.04 | 0.05  | 0.22 | 0.00 | 2.54 | 1.27 |             |
|               | 13 | 3.70  | -0.68 | -0.19 | 14.21 | 3.77 | 0.90 | 2.58 | 1.29 |             |
|               | 14 | 0.51  | -0.07 | 0.01  | 0.26  | 0.51 | 0.02 | 2.68 | 1.34 |             |
|               | 15 | -0.30 | -0.24 | -0.01 | 0.15  | 0.38 | 0.01 | 2.69 | 1.35 |             |
|               | 16 | 4.25  | -1.18 | -0.02 | 19.45 | 4.41 | 1.31 | 2.75 | 1.37 |             |
|               | 17 | -1.56 | 0.53  | 0.13  | 2.73  | 1.65 | 0.19 | 2.81 | 1.40 |             |
|               | 18 | -0.95 | 0.28  | 0.01  | 0.99  | 0.99 | 0.07 | 2.93 | 1.46 |             |
|               | 19 | -0.42 | 0.46  | -0.04 | 0.39  | 0.62 | 0.03 | 2.93 | 1.47 |             |
|               | 20 | -0.63 | -0.35 | -0.01 | 0.52  | 0.72 | 0.04 | 2.96 | 1.48 |             |

---
